# Supplementary material for: Synthetic bovine lactoferrin peptide Lfampin kills Entamoeba histolytica trophozoites by necrosis and resolves amoebic intracecal infection in mice
Source: PubMed Central journal article supplement (PMC6328891; doi:10.1042/bsr20180850), 2019-01-08

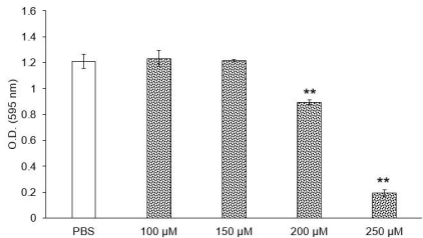

**A**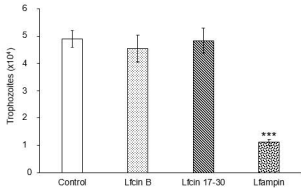**B**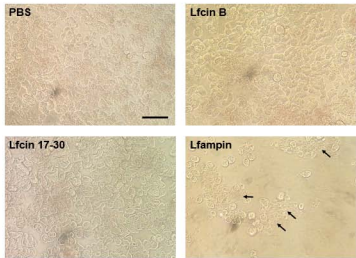

Supplement: bsr20180850_Supp1.pdf [file bsr20180850_Supp1.pdf]
